# Supplementary material for: PPARG Polymorphisms Are Associated with Unexplained Mild Vision Loss in Patients with Type 2 Diabetes Mellitus
Source: Hindawi journal article supplement (doi:10.1155/2019/5284867), 2019-12-12
Supplement: f1 [file 5284867.f1.pdf]

Supplement 1: Fluidigm SNP genotyping markers

|            | A<br>L<br>L<br>E<br>L<br>E | SNP_SEQ                                                                                                                                                                                                                        | ASP1_SEQ                                       | ASP2_SEQ                                      | LSP_SEQ                               | STA_SEQ                                | A<br>M<br>P<br>-<br>G<br>C |
|------------|----------------------------|--------------------------------------------------------------------------------------------------------------------------------------------------------------------------------------------------------------------------------|------------------------------------------------|-----------------------------------------------|---------------------------------------|----------------------------------------|----------------------------|
| rs10865710 | C<br>G                     | AGTTTCATGTAGGTAAGACTGTGTAGAATGTCGGGTCTCGATGTTGGCGCTATTCAAG<br>CCCTGATGATAAGGCTTTTGGCATTAGATGCTGTTTTGTCTT[C/G]ATGGAAAATACAGC<br>TATTCTAGGATCCTTGAGCCTTTTATAAGAGATAAGGTTGTGAATCCTAAGACCCTAGG<br>ACCRTTTACTTAGATGATCTGCTCTCT      | TGGCATTAG<br>ATGCTGTTT<br>TGTCTTC              | TGGCATTAG<br>ATGCTGTTT<br>TGTCTTG             | GGCTCA<br>AGGATC<br>CTAGAAT<br>AGCTGT | CAAGCC<br>CTGATGA<br>TAAGGCT<br>TT     | 0.<br>41                   |
| rs18012    | C<br>G                     | TTGATCTTTTGCTAGATAGAGACAAAATATCAGTGTGAATTACAGCAAACCCCTATTCCA<br>TGCTGTTATGGGTGAAACTCTGGGAGATTCTCCTATTGAC[C/G]CAGAAAGCGATTCCCT<br>TCACTGATACACTGTCTGCAAACATATCACAAAGTAAAGTTCCCTCCAGATACGGCTAT<br>TGGGGACGTGGGGGCATTATGTAAG      | CAGTGAAG<br>GAATCGCTT<br>TCTGG                 | CAGTGAAG<br>GAATCGCTT<br>TCTGC                | GCAAAC<br>CCCTATT<br>CCATGCT<br>GT    | TGTGATA<br>TGTTTGC<br>AGACAGT<br>GTATC | 0.<br>47                   |
| rs3856806  | C<br>T                     | CCCTGGAGCTCCAGCTGAAGCTGAACCACCCTGAGTCCTCACAGCTGTTTGCCAAG<br>CTGCTCCAGAAAATGACAGACCTCAGACAGATTGTCACGGAACA[C/T]GTGCAGCTAC<br>TGCAGGTGATCAAGAAGACGGAGACAGACATGAGTCTTCACCYGCTCCTGCAGGAG<br>ATCTACAAGGACTTGTAAGTACTAGCAGAGAGTCTCTGA | TCAGACAG<br>ATTGTCACG<br>GAACAC                | TCAGACAG<br>ATTGTCACG<br>GAACAT               | TCCGTCT<br>TCTTGAT<br>CACCTG<br>CA    | GCTGCT<br>CCAGAAA<br>ATGACAG<br>A      | 0.<br>51                   |
| rs709158   | A<br>G                     | CTCTGCAGCAGGCAAAAAGCTCTTTTGTAAATCAAACAGTTTGGAAATCCATTCAGT<br>TCTTCCTAAACCTCCAAGATACGGGGGAGGAAATCACTGG[A/G]TTTTACAATATATTT<br>TTCAAGGCAAAATGCCATCGCCGCTCCTAATGACAGAGAAGCTGCCGATACACTACAA<br>CGGCTGCAGATGGCAAGTCATCCAGCC         | ATGGCAATT<br>TGCCTTGAA<br>AAATATATTG<br>TAAAAT | TGGCAATTT<br>GCCTTGAA<br>AAATATATT<br>GTAAAAC | CTCCAA<br>GATACG<br>GGGGAG<br>GA      | TCTGTCA<br>TTAGGAC<br>GGCGA            | 0.<br>38                   |

STA =specific target amplification , LSP= locus-specific primer , ASP=allele-specific primers ,
